1 **Data Supplement Fig. S1.**

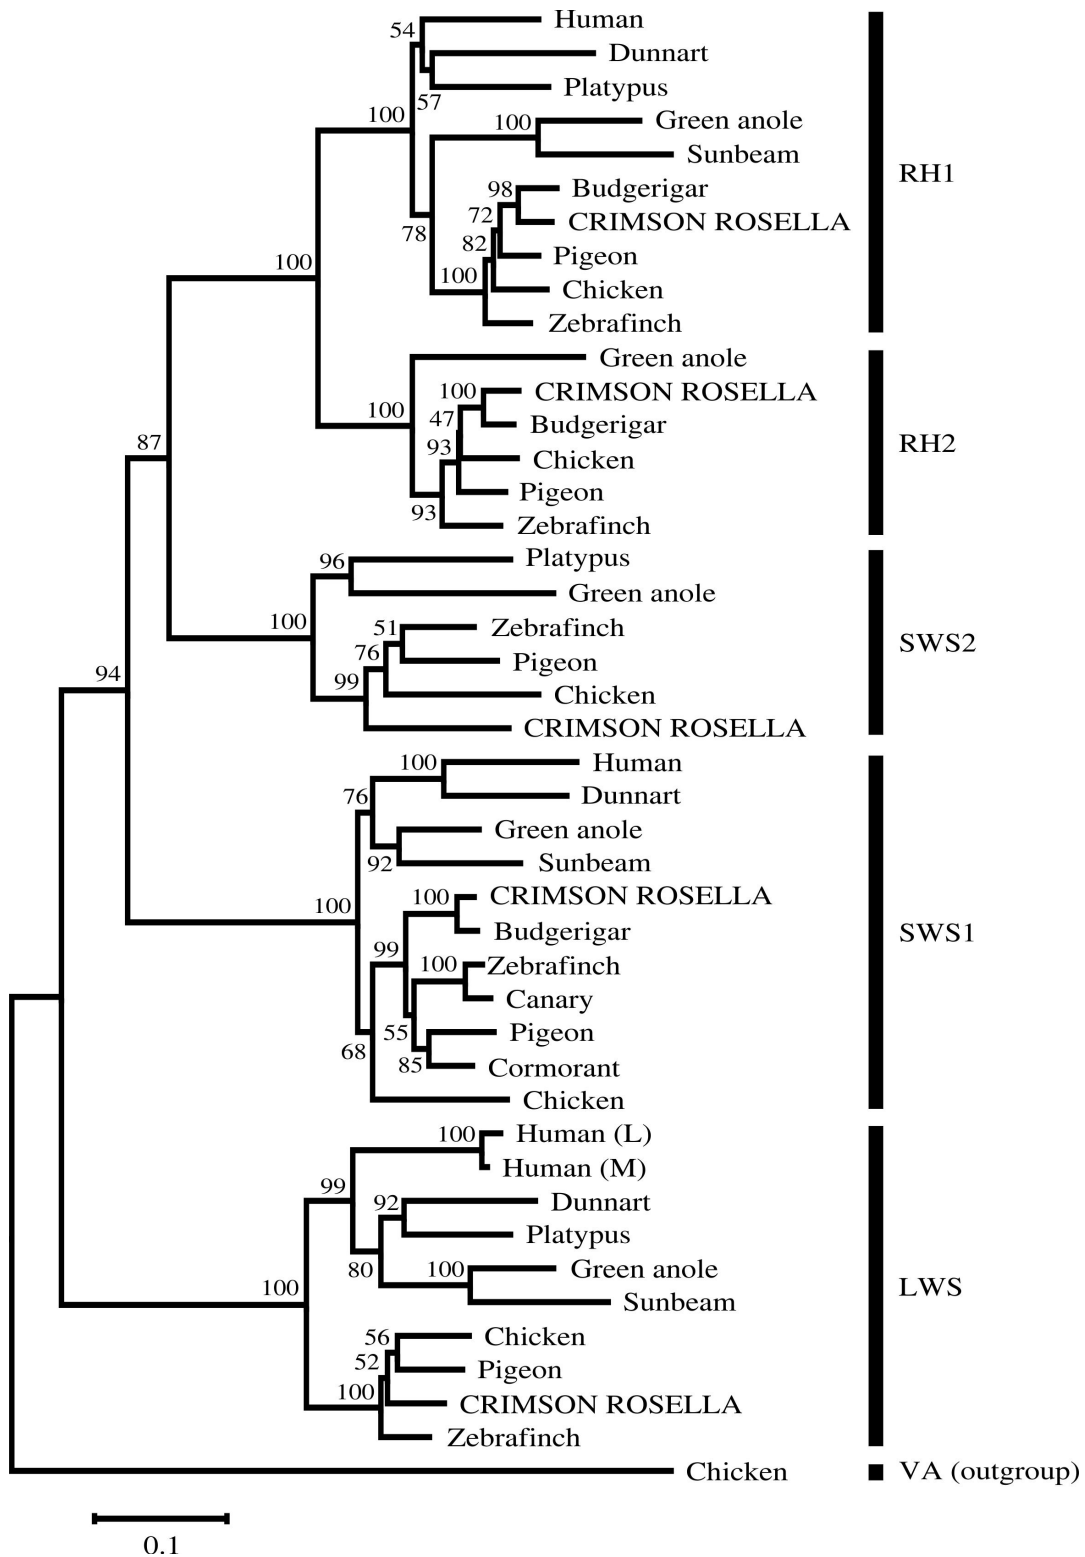

2

3 **Data Supplement Fig. S1.** Phylogenetic analysis of *P. elegans* LWS, SWS1, SWS2, RH2  
 4 and RH1 visual opsins (GenBank accession nos. KF134487-KF134493) compared to  
 5 orthologues present in representative reptiles, birds and mammals, with chicken (*Gallus*

6 *gallus*) vertebrate ancient (VA) opsin (GenBank accession no. GQ280390) included as an  
7 outgroup. The degree of support for internal branching is expressed as a percentage with the  
8 scale bar indicating the number of nucleotide substitutions per site. The sequences used for  
9 generating the tree are as follows: (1) RH1 opsin class: human (*Homo sapiens*), NM000539;  
10 fat-tailed dunnart (*Sminthopsis crassicaudata*), AY159786; platypus (*Ornithorhynchus*  
11 *anatinus*), EF050076; green anole (*Anolis carolinensis*), AOIRHODOPS; sunbeam snake  
12 (*Xenopeltis unicolor*), FJ497233; budgerigar (*Melopsittacus undulatus*), AF021242; pigeon  
13 (*Columba livia*), AH007730; chicken (*Gallus gallus*), NM001030606; and zebrafinch  
14 (*Taeniopygia guttata*), NM001076695; (2) RH2 opsin class: green anole (*Anolis*  
15 *carolinensis*), AH004781; budgerigar (*Melopsittacus undulatus*), AF021241; chicken (*Gallus*  
16 *gallus*), M92038; pigeon (*Columba livia*), AH007731; and zebrafinch (*Taeniopygia guttata*),  
17 NM001076696; (3) SWS2 opsin class; platypus (*Ornithorhynchus anatinus*), EF050077;  
18 green anole (*Anolis carolinensis*), AF133907; zebrafinch (*Taeniopygia guttata*),  
19 NM001076697; pigeon (*Columba livia*), AH007799; and chicken (*Gallus gallus*),  
20 NM205517; (4) SWS1 opsin class: human (*Homo sapiens*), NM001708; fat-tailed dunnart  
21 (*Sminthopsis crassicaudata*), AY442173; green anole (*Anolis carolinensis*), AH007736;  
22 sunbeam snake (*Xenopeltis unicolor*), FJ497234; budgerigar (*Melopsittacus undulatus*),  
23 Y11787; zebrafinch (*Taeniopygia guttata*), NM001076704; canary (*Serinus canaria*),  
24 AJ277922; pigeon (*Columba livia*), AH007798; cormorant (*Phalacrocorax carbo*),  
25 EF568933; and chicken (*Gallus gallus*), NM205438; (5) LWS opsin class: human (*Homo*  
26 *sapiens*), NM020061 (L cone) and NM000513 (M cone); fat-tailed dunnart (*Sminthopsis*  
27 *crassicaudata*), AY430816; platypus (*Ornithorhynchus anatinus*), EF050078; green anole  
28 (*Anolis carolinensis*), ACU08131; sunbeam snake (*Xenopeltis unicolor*), FJ497235; chicken  
29 (*Gallus gallus*), NM205440; pigeon (*Columba livia*), AH007800; and zebrafinch  
30 (*Taeniopygia guttata*), NM001076702.

1 **DATA SUPPLEMENT**

2 **Data Supplement Table 1. Oligonucleotides used in 5'- and 3'-RACE**

| <b>Primer name</b> | <b>Sequence (5' to 3')</b>      |
|--------------------|---------------------------------|
| ROS_LWS_F1         | TATCTCTGGTCCTTGGCCATCATCTCCTGG  |
| ROS_LWS_F2         | AACATCAAGTTCGATGGGAAGCTGGCGGTG  |
| ROS_LWS_F3         | TAATAAATCGTGCGGCCCCGACGTGTTTCAG |
| ROS_LWS_R1         | TATATTATGGCCAAGGACCAGAGCGCGGTG  |
| ROS_LWS_R2         | ATATCTCCAGACCCAGGAGAAGACGTACCC  |
| ROS_LWS_R3         | TAATATATCGGGGCCGCACGAGGTCTTCAG  |
| ROS_RH2_F1         | TTCATCCACTTCATCATCCCAGTCGTGGTC  |
| ROS_RH2_F2         | TAAATCGTGGTGGCGTTCTGGATCTTCACC  |
| ROS_RH2_R1         | TTAAAATCGATGCCCATCATGGCGTGGCTC  |
| ROS_RH2_R2         | ATAAGGCGCCCGTAGGAGAAGAAAATCTCC  |
| ROS_RH2_R3         | TTTGTTGGTGAAGATCCAGAACGCCACCAC  |
| ROS_RH1_F1         | TTTCTTCTGCTACGGGAACCTGGTTTGCAC  |
| ROS_RH1_F2         | CCAGTGTCGCTTTCTACATCTTCACCAACC  |
| ROS_RH1_R1         | AATTAAGGAGAAGGCAACGCCCATGATGGC  |
| ROS_RH1_R2         | CTGATCATCAGCGGGATCATGAAGTGAACC  |
| ROS_RH1_R3         | TAGTCATGAAGATGGGCCCAAAGTCTGACC  |

31 **Data Supplement Table S2.**

| <b>Species</b>                   | <b>Common name</b>      | <b>GenBank accession no:</b> |
|----------------------------------|-------------------------|------------------------------|
| <i>Homo sapiens</i>              | Human                   | NM000539                     |
| <i>Sminthopsis crassicaudata</i> | Fat-tailed dunnart      | AY159786                     |
| <i>Ornithorhynchus anatinus</i>  | Platypus                | EF050076                     |
| <i>Columba livia</i>             | Pigeon                  | AH007730                     |
| <i>Melopsittacus undulatus</i>   | Budgerigar              | AF021242                     |
| <i>Gallus gallus</i>             | Chicken                 | NM001030606                  |
| <i>Taeniopygia guttata</i>       | Zebra finch             | NM001076695                  |
| <i>Platyercus elegans</i>        | Crimson rosella         | KF134487                     |
| <i>Anolis carolinensis</i>       | Green anole             | AOIRHODOPS                   |
| <i>Xenopeltis unicolor</i>       | Sunbeam snake           | FJ497233                     |
| <i>Xenopus tropicalis</i>        | Western clawed frog     | NM001097334                  |
| <i>Danio rerio</i>               | Zebrafish               | HM367063                     |
| <i>Callorhynchus milii</i>       | Elephant shark chimaera | EF565167                     |
| <i>Geotria australis</i>         | Pouched lamprey         | AY366493                     |

32

33 **Data Supplement Table S2.** Sequences used for generating the RH1 alignment in Figure 2  
34 of the main article.

1 **Data Supplement Table S3. Spectral tuning of visual pigments in *P. elegans***

| Pigment (gene/ $\lambda_{\max}$ )                                                                                                                            | Tuning site location              | Ancestral tuning sites | Tuning site consensus in birds | Visual pigments in <i>P. elegans</i> |                                                                                                                     |                                                    |                                     |
|--------------------------------------------------------------------------------------------------------------------------------------------------------------|-----------------------------------|------------------------|--------------------------------|--------------------------------------|---------------------------------------------------------------------------------------------------------------------|----------------------------------------------------|-------------------------------------|
|                                                                                                                                                              |                                   |                        |                                | Tuning Site                          | Expected spectral peak<br>(Exp; $\lambda_{\max}$ )                                                                  | Observed spectral peak<br>(Obs; $\lambda_{\max}$ ) | $\Delta$ spectral peak<br>(Exp-Obs) |
| LWS<br><br>(ancestral $\lambda_{\max}$ = 560 nm (Davies et al., 2007); average avian $\lambda_{\max}$ = 563 nm <sup>#1</sup> )                               | 164/181/261/<br><br>269/292       | SHYTA                  | SHYTA                          | SHYTA                                | 560 nm (ancestor)<br><br>563 nm (Aves)                                                                              | 567 nm                                             | -7 nm<br><br>-4 nm                  |
| SWS1<br><br>(ancestral $\lambda_{\max}$ = 360 nm (Davies et al., 2007); average avian $\lambda_{\max}$ = 365 nm [UV-sensitive pigments only] <sup>#2</sup> ) | 46/49/52/86/<br><br>90/93/114/118 | FFTFSTAS               | (L/V)(L/V)T(A/C)CTGA           | VLTACTG<br><br>A                     | 360 nm (ancestor)<br><br>381 nm (modified from budgerigar ( <i>Melopsittacus undulates</i> ) and other vertebrates) | 365 nm                                             | -5 nm<br><br>+16 nm                 |

|                                                                                                                                       |                                 |                 |                                 |                 |                                                                                                                         |        |                     |
|---------------------------------------------------------------------------------------------------------------------------------------|---------------------------------|-----------------|---------------------------------|-----------------|-------------------------------------------------------------------------------------------------------------------------|--------|---------------------|
|                                                                                                                                       |                                 |                 |                                 |                 | 365 nm (Aves)                                                                                                           |        | 0 nm                |
| SWS2<br><br>(ancestral $\lambda_{\max}$ = 440 nm<br>(Davies et al., 2007); average<br>avian $\lambda_{\max}$ = 451 nm <sup>#3</sup> ) | 46/49/52/93/164<br><br>/207/269 | FIVTALA         | (A/L)(A/L)(G/V)TGL(A/C/<br>S/T) | AAVTGLA         | 440 nm (ancestor)<br><br>451 nm (modified<br>from pigeon<br>( <i>Columba livia</i> ) and<br>other vertebrates;<br>Aves) | 440 nm | 0 nm<br><br>+11 nm  |
| RH2<br><br>(ancestral $\lambda_{\max}$ = 495 nm<br>(Davies et al., 2007); average<br>avian $\lambda_{\max}$ = 505 nm <sup>#4</sup> )  | 83/122/207/211/<br>265/292/295  | DEMHWAS         | DQMHWAS                         | DQMHWAS         | 476 nm (modified<br>from ancestral and<br>bovine ( <i>Bos taurus</i> )<br>pigments)<br><br>505 nm (Aves)                | 509 nm | -33 nm<br><br>-4 nm |
| RH1<br><br>(ancestral $\lambda_{\max}$ = 500 nm<br>(Davies et al., 2007); average<br>avian $\lambda_{\max}$ = 505 nm <sup>#5</sup> )  | 83/122/207/211/<br>265/292/295  | DEMHWA<br><br>A | DEMHWAA                         | DEMHWA<br><br>A | 500 nm (ancestor)<br><br>503 nm (Aves)                                                                                  | 510 nm | -10 nm<br><br>-7 nm |

3 #1, average avian spectral peak ( $\lambda_{\max} = 563 \pm 5$  nm) derived from LWS pigments of pigeon, *Columba livia* ( $\lambda_{\max} = 558$  nm) (Kawamura et al.,  
4 1999), chicken, *Gallus gallus* ( $\lambda_{\max} = 571$  nm) (Okano et al., 1992), zebrafinch, *Taeniopygia guttata* ( $\lambda_{\max} = 560$  nm) (Yokoyama et al., 2000)  
5 and turkey, *Meleagris gallopavo* ( $\lambda_{\max} = 564$  nm) (Hart et al., 1999); #2, average avian spectral peak ( $\lambda_{\max} = 365 \pm 6$  nm) derived from UV-  
6 sensitive SWS1 pigments of canary, *Serinus canaria* ( $\lambda_{\max} = 366$  nm) (Das et al., 1999), budgerigar, *Melopsittacus undulates* ( $\lambda_{\max} = 371$  nm)  
7 (Wilkie et al., 1998) and zebrafinch, *Taeniopygia guttata* ( $\lambda_{\max} = 359$  nm) (Yokoyama et al., 2000); #3, average avian spectral peak ( $\lambda_{\max} = 451$   
8  $\pm 8$  nm) derived from SWS2 pigments of pigeon, *Columba livia* ( $\lambda_{\max} = 448$  nm) (Kawamura et al., 1999), chicken, *Gallus gallus* ( $\lambda_{\max} = 455$   
9 nm) (Okano et al., 1992), zebrafinch, *Taeniopygia guttata* ( $\lambda_{\max} = 441$  nm) (Yokoyama et al., 2000) and turkey, *Meleagris gallopavo* ( $\lambda_{\max} = 460$   
10 nm) (Hart et al., 1999); #4, average avian spectral peak ( $\lambda_{\max} = 505 \pm 2$  nm) derived from RH2 pigments of pigeon, *Columba livia* ( $\lambda_{\max} = 503$   
11 nm) (Kawamura et al., 1999), chicken, *Gallus gallus* ( $\lambda_{\max} = 508$  nm) (Okano et al., 1992), zebrafinch, *Taeniopygia guttata* ( $\lambda_{\max} = 505$  nm)  
12 (Yokoyama et al., 2000) and turkey, *Meleagris gallopavo* ( $\lambda_{\max} = 505$  nm) (Hart et al., 1999); and #5, average avian spectral peak ( $\lambda_{\max} = 503 \pm$   
13 1 nm) derived from RH1 pigments of pigeon, *Columba livia* ( $\lambda_{\max} = 502$  nm) (Kawamura et al., 1999), chicken, *Gallus gallus* ( $\lambda_{\max} = 503$  nm)  
14 (Okano et al., 1992), zebrafinch, *Taeniopygia guttata* ( $\lambda_{\max} = 502$  nm) (Yokoyama et al., 2000) and turkey, *Meleagris gallopavo* ( $\lambda_{\max} = 504$  nm)  
15 (Hart et al., 1999).

16

17

18

19

## 20 **Data Supplement References**

- 21 **Das, D., Wilkie, S. E., Hunt, D. M. and Bowmaker, J. K.** (1999). Visual pigments and oil droplets in the retina of a passerine bird, the canary *Serinus canaria*:  
22 microspectrophotometry and opsin sequences. *Vision Res* **39**, 2801-2815.
- 23 **Davies, W. L., Cowing, J. A., Carvalho, L. S., Potter, I. C., Trezise, A. E., Hunt, D. M. and Collin, S. P.** (2007). Functional characterization, tuning, and  
24 regulation of visual pigment gene expression in an anadromous lamprey. *FASEB J* **21**, 2713-2724.
- 25 **Hart, N. S., Partridge, J. C. and Cuthill, I. C.** (1999). Visual pigments, cone oil droplets, ocular media and predicted spectral sensitivity in the domestic turkey  
26 (*Meleagris gallopavo*). *Vision Res* **39**, 3321-3328.
- 27 **Kawamura, S., Blow, N. S. and Yokoyama, S.** (1999). Genetic analyses of visual pigments of the pigeon (*Columba livia*). *Genetics* **153**, 1839-1850.
- 28 **Okano, T., Kojima, D., Fukada, Y., Shichida, Y. and Yoshizawa, T.** (1992). Primary structures of chicken cone visual pigments: vertebrate rhodopsins have  
29 evolved out of cone visual pigments. *Proc Natl Acad Sci U S A* **89**, 5932-5936.
- 30 **Wilkie, S. E., Vissers, P. M., Das, D., Degrip, W. J., Bowmaker, J. K. and Hunt, D. M.** (1998). The molecular basis for UV vision in birds: spectral  
31 characteristics, cDNA sequence and retinal localization of the UV-sensitive visual pigment of the budgerigar (*Melopsittacus undulatus*). *Biochem J* **330 ( Pt**  
32 **1)**, 541-547.
- 33 **Yokoyama, S., Blow, N. S. and Radlwimmer, F. B.** (2000). Molecular evolution of color vision of zebra finch. *Gene* **259**, 17-24.
